# Supplementary figures and images for: Impact of low-density lipoprotein cholesterol-lowering therapy on intermediate stenosis in non- culprit vessels of acute coronary syndrome
Source: Research Square preprint supplement (doi:10.21203/rs.3.rs-6939516/v1), 2025-07-23

# (1) Supplemental figure 1

## Study enrollment

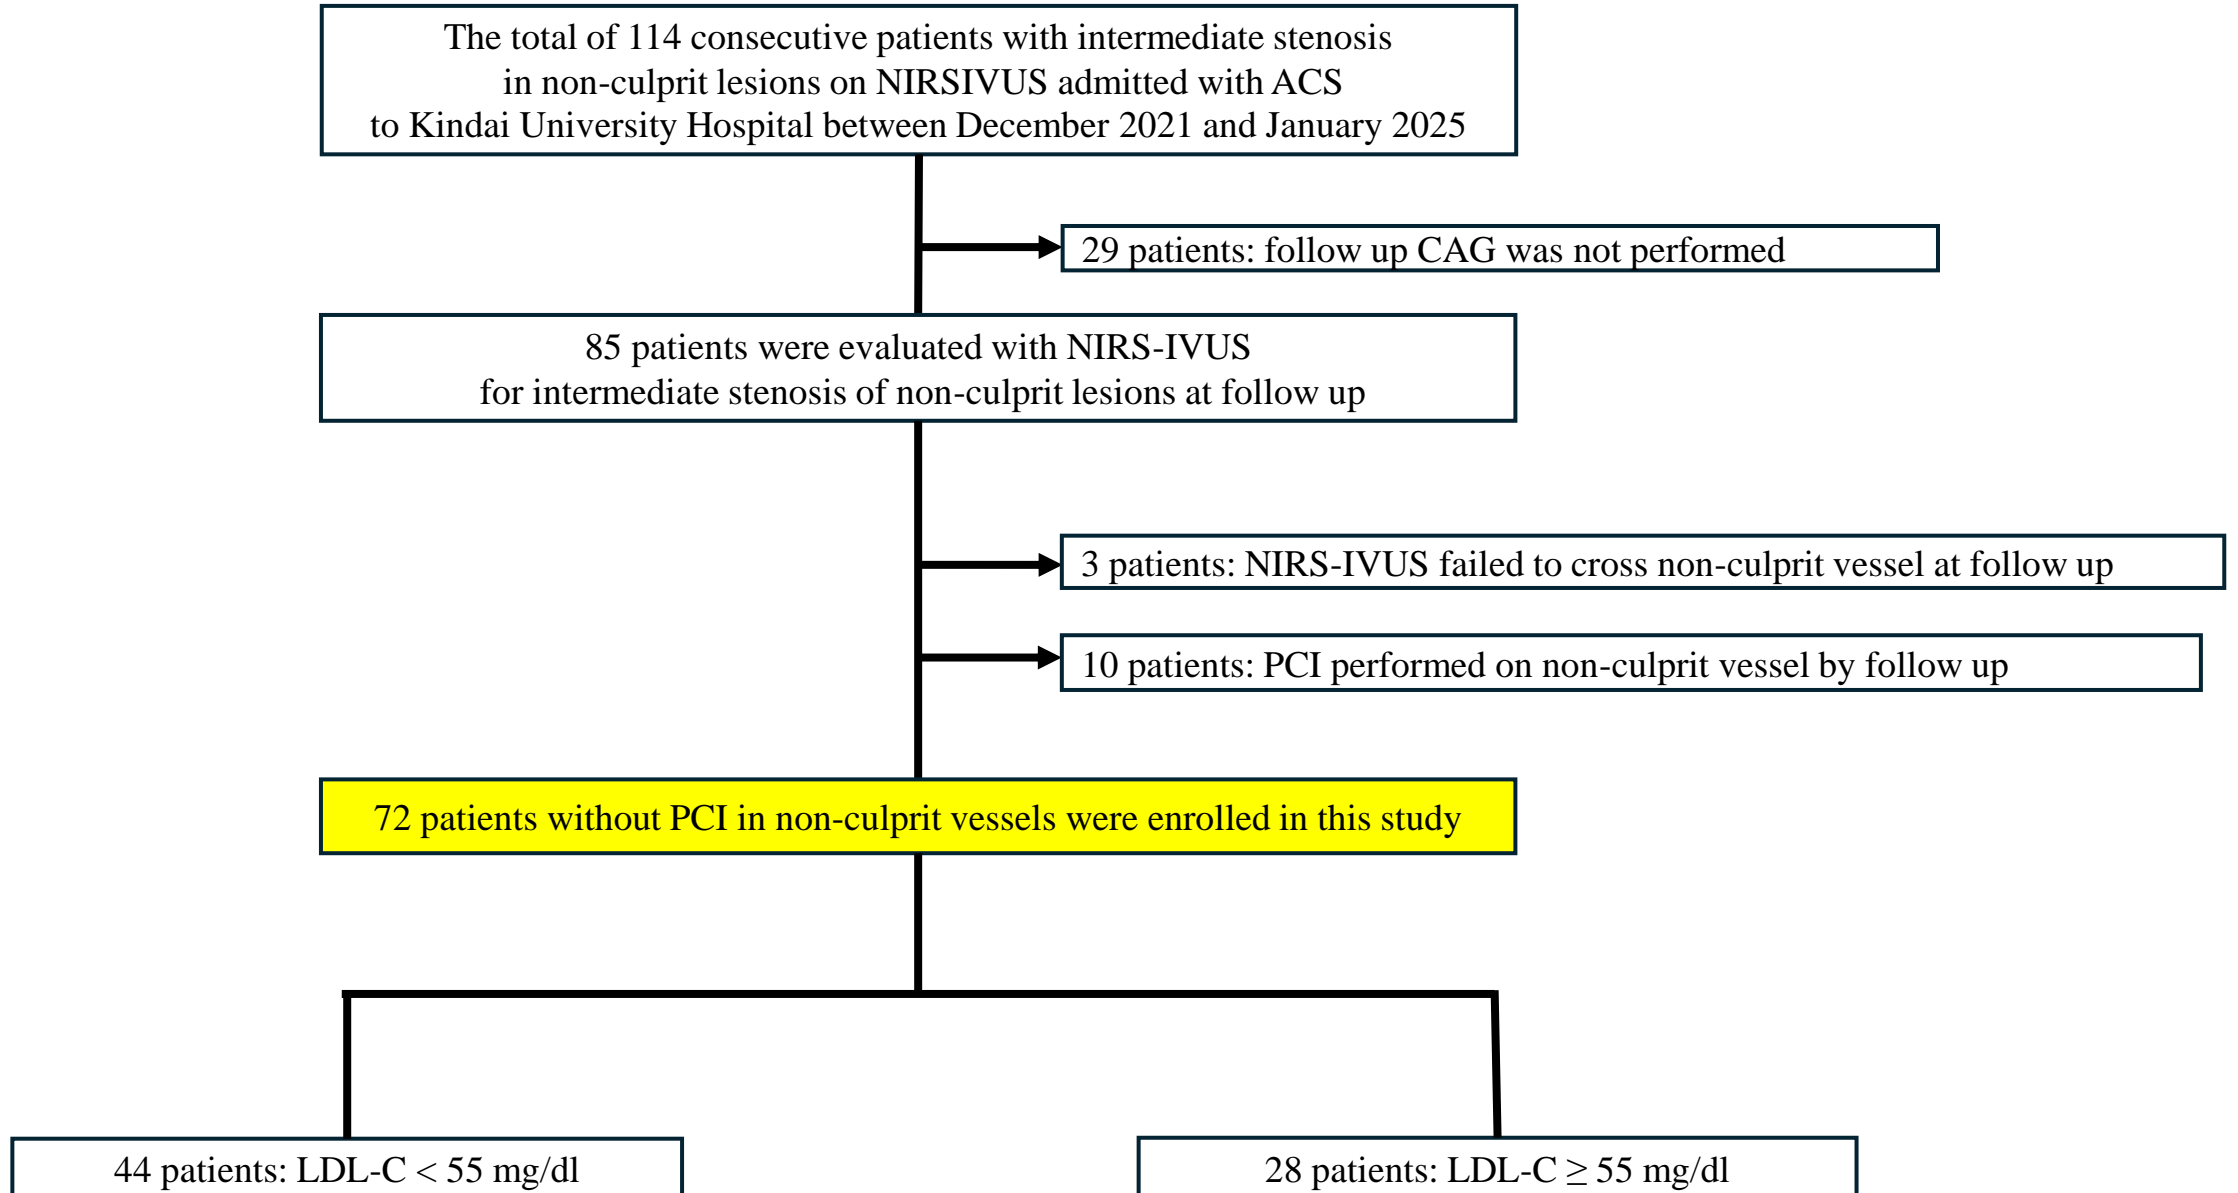

Supplement: Supplementary file 1 [file 4dc0005bb24321045485a983.pdf]
